# Supplementary material for: Development and Validation of a New LC-MS/MS Bioanalytical Method for the Simultaneous Determination of Levodopa, Levodopa Methyl Ester, and Carbidopa in Human Plasma Samples
Source: MDPI journal article supplement (doi:10.3390/molecules28114264), 2023-05-23

**Table S1.** Summary of matrix effect (ME) and recovery (RE) data and internal standard normalized (ISn) values (n=6). L-DOPA (Levodopa); LDME (Levodopa-methyl-ester); L-DOPA-d3 (Levodopa-d3); LQC = low QC (300 µg/L); MQC = medium QC (900 µg/L); HQC = high QC (1800 µg/L).

| MATRIX EFFECT AND RECOVERY |      |     |     |     |      |     |     |           |     |     |           |     |     |
|----------------------------|------|-----|-----|-----|------|-----|-----|-----------|-----|-----|-----------|-----|-----|
| L-DOPA                     |      |     |     |     | LDME |     |     | Carbidopa |     |     | L-DOPA-d3 |     |     |
|                            |      | LQC | MQC | HQC | LQC  | MQC | HQC | LQC       | MQC | HQC | LQC       | MQC | HQC |
| ME%                        | Mean | 102 | 105 | 102 | 97   | 98  | 97  | 107       | 106 | 98  | 100       | 98  | 95  |
|                            | SD   | 2.9 | 2.6 | 3.8 | 6.6  | 4.1 | 4.1 | 4.7       | 3.4 | 1.8 | 4.2       | 0.9 | 3.0 |
| ISn-ME%                    | Mean | 102 | 107 | 108 | 97   | 100 | 103 | 107       | 109 | 104 | -         | -   | -   |
|                            | SD   | 6.8 | 2.4 | 4.3 | 8.0  | 3.9 | 5.6 | 7.0       | 3.1 | 4.4 | -         | -   | -   |
| RE%                        | Mean | 113 | 106 | 104 | 77   | 77  | 77  | 95        | 88  | 88  | 101       | 100 | 93  |
|                            | SD   | 2.8 | 6.7 | 4.6 | 7.0  | 6.5 | 6.3 | 6.2       | 5.9 | 2.3 | 4.5       | 3.6 | 4.9 |
| ISn-RE%                    | Mean | 112 | 106 | 112 | 76   | 77  | 83  | 94        | 89  | 95  | -         | -   | -   |
|                            | SD   | 7.3 | 6.9 | 8.4 | 5.0  | 5.9 | 4.2 | 6.5       | 3.3 | 4.4 | -         | -   | -   |

**Figure S1.** L-DOPA, LDME and Carbidopa (C-DOPA) short-term and medium-term stability in plasma samples and extracts at different storage times and conditions (n=3). Stability is expressed as percentage difference from T0 (% of degradation). Reference lines show acceptability range within ± 15%.

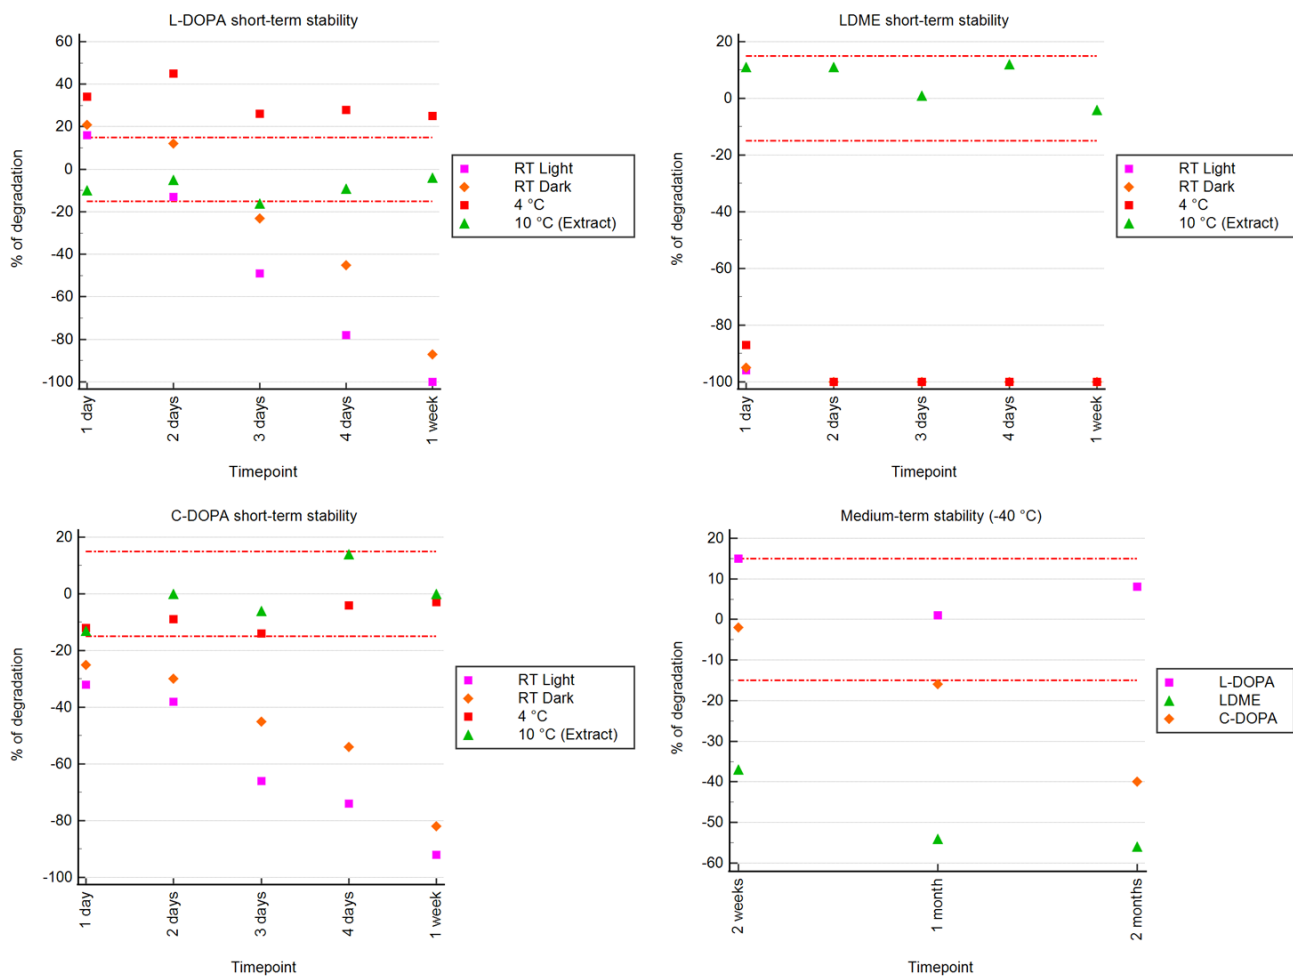

Supplement: s1 [file s1]
